# Supplementary material for: Microscopy-based Saccharomyces cerevisiae complementation model reveals functional conservation and redundancy of N-terminal acetyltransferases
Source: PubMed Central journal article supplement (PMC4995432; doi:10.1038/srep31627), 2016-08-24
Supplement: srep31627-s1.pdf [file srep31627-s1.pdf]

## Supplementary Information

**Title:** Microscopy-based *Saccharomyces cerevisiae* complementation model reveals functional conservation and redundancy of N-terminal acetyltransferases

**Authors:** Camilla Osberg<sup>1,2</sup>, Henriette Aksnes<sup>1</sup>, Sandra Ninzima<sup>1</sup>, Michaël Marie<sup>1</sup>, Thomas Arnesen<sup>1,2\*</sup>

## Supplementary tables

**Table S1. Yeast strains of this study.**

| yTA # | Short name                 | Genotype                                                                                                | pTA #    | Use               | Source                    |
|-------|----------------------------|---------------------------------------------------------------------------------------------------------|----------|-------------------|---------------------------|
| 36    | WT                         | BY4742                                                                                                  |          | SG                | EUROSCARF (#Y10000)       |
| 44    | 30Δ                        | BY4742; <i>naa30Δ::kanMX4</i>                                                                           |          | SG                | EUROSCARF (#Y15470)       |
| 59    | WT                         | BY4741                                                                                                  |          | SG                | EUROSCARF (#Y00000)       |
| 256   | Arl3-GFP, WT               | BY4741; <i>ARL3::GFP-HIS3MX6</i>                                                                        |          | Fig. 1A,D, SG     | Invitrogen (GFP-collect.) |
| 266   | Arl3-GFP, 30Δ              | BY4741; <i>ARL3::GFP-HIS3MX6, naa30Δ::kanMX4</i>                                                        |          | Fig. 1A,D, SG     | <sup>1</sup>              |
| 480   | Arl3-GFP, 35Δ              | BY4741; <i>ARL3::GFP-HIS3MX6; naa35Δ::kanMX4</i>                                                        |          | Fig. 1A,D, SG     | This study                |
| 485   | Arl3-GFP, 38Δ              | BY4741; <i>ARL3::GFP-HIS3MX6; naa38Δ::kanMX4</i>                                                        |          | Fig. 1A,D         | This study                |
| 375   | Arl3-GFP, 30Δ, h30         | BY4741; <i>ARL3::GFP-HIS3MX6; naa30Δ::kanMX4; [pBEVY-U-HA-hNAA30]</i>                                   | 231      | Fig. 1B,D, Fig. 4 | This study                |
| 728   | Arl3-GFP, 35Δ, h30         | BY4741; <i>ARL3::GFP-HIS3MX6; naa35Δ::kanMX4; [pBEVY-U-HA-hNAA30]</i>                                   | 231      | Fig. 1B,D         | This study                |
| 730   | Arl3-GFP, 35Δ, h35         | BY4741; <i>ARL3::GFP-HIS3MX6; naa35Δ::kanMX4; [pBEVY-L-hNAA35-FLAG]</i>                                 | 226      | Fig. 1B,D         | This study                |
| 772   | Arl3-GFP, 35Δ38Δ, h35      | BY4741; <i>ARL3::GFP-HIS3MX6; naa35Δ::kanMX4; naa38Δ::hphNT1; [pBEVY-L-hNAA35]</i>                      | 226      | Fig. 1B,D         | This study                |
| 732   | Arl3-GFP, 35Δ, h30, h35    | BY4741; <i>ARL3::GFP-HIS3MX6; naa35Δ::kanMX4; [pBEVY-U-HA-hNAA30]; [pBEVY-L-hNAA35-FLAG]</i>            | 226, 231 | Fig. 1C,D         | This study                |
| 698   | Arl3-GFP, 30Δ35Δ, h30, h35 | BY4741; <i>ARL3::GFP-HIS3MX6; naa30Δ::kanMX4; naa35Δ::natNT2; [pBEVY-U-HA-hNAA30]; [pBEVY-L-hNAA35]</i> | 226, 231 | Fig. 1C,D         | This study                |

| yTA # | Short name                         | Genotype                                                                                                                                              | pTA #    | Use            | Source     |
|-------|------------------------------------|-------------------------------------------------------------------------------------------------------------------------------------------------------|----------|----------------|------------|
| 751   | Arl3-GFP, NatCΔ, pBEVY-U, pBEVY-L  | BY4741; <i>ARL3::GFP-HIS3MX6</i> ; <i>naa30Δ::kanMX4</i> ; <i>naa35Δ::natNT2</i> ; <i>naa38Δ::hphNT1</i> ; [pBEVY-U]; [pBEVY-L]                       | 53, 224  | Fig. 1C,D      | This study |
| 753   | Arl3-GFP, NatCΔ, h30, h35          | BY4741; <i>ARL3::GFP-HIS3MX6</i> ; <i>naa30Δ::kanMX4</i> ; <i>naa35Δ::natNT2</i> ; <i>naa38Δ::hphNT1</i> ; [pBEVY-U-HA-hNAA30]; [pBEVY-L-hNAA35-FLAG] | 226, 231 | Fig. 1C,D      | This study |
| 692   | Arl3-GFP, 30Δ35Δ, pBEVY-U, pBEVY-L | BY4741; <i>ARL3::GFP-HIS3MX6</i> ; <i>naa30Δ::kanMX4</i> ; <i>naa35Δ::natNT2</i> ; [pBEVY-U]; [pBEVY-L]                                               | 53, 224  | Fig. 1D        | This study |
| 696   | Arl3-GFP, 30Δ35Δ, h30, pBEVY-L     | BY4741; <i>ARL3::GFP-HIS3MX6</i> ; <i>naa30Δ::kanMX4</i> ; <i>naa35Δ::natNT2</i> ; [pBEVY-U-HA-hNAA30]; [pBEVY-L]                                     | 224, 231 | Fig. 1D        | This study |
| 694   | Arl3-GFP, 30Δ35Δ, pBEVY-U, h35     | BY4741; <i>ARL3::GFP-HIS3MX6</i> ; <i>naa30Δ::kanMX4</i> ; <i>naa35Δ::natNT2</i> ; [pBEVY-U]; [pBEVY-L-hNAA35]                                        | 53, 226  | Fig. 1D        | This study |
| 673   | Arl3-GFP, pBEVY-L, pBEVY-U         | BY4741; <i>ARL3::GFP-HIS3MX6</i> ; [pBEVY-L]; [pBEVY-U]                                                                                               | 53, 224  | Fig. 1D (Ctrl) | This study |
| 770   | Arl3-GFP, 35Δ38Δ, pBEVY-L          | BY4741; <i>ARL3::GFP-HIS3MX6</i> ; <i>naa35Δ::kanMX4</i> ; <i>naa38Δ::hphNT1</i> ; [pBEVY-L]                                                          | 224      | Fig. 2         | This study |
| 858   | Arl3-GFP, 35Δ, h35 (n.t.)          | BY4741; <i>ARL3::GFP-HIS3MX6</i> ; <i>naa35Δ::kanMX4</i> ; [pBEVY-L-hNAA35]                                                                           | 342      | Fig. 2         | This study |
| 860   | Arl3-GFP, 35Δ38Δ, h35 (n.t.)       | BY4741; <i>ARL3::GFP-HIS3MX6</i> , <i>naa35Δ::kanMX4</i> ; <i>naa38Δ::hphNT1</i> ; [pBEVY-L-hNAA35]                                                   | 342      | Fig. 2         | This study |
| 862   | Arl3-GFP, NatCΔ, h30, h35 (n.t.)   | BY4741; <i>ARL3::GFP-HIS3MX6</i> ; <i>naa30Δ::kanMX4</i> ; <i>naa35Δ::natNT2</i> ; <i>naa38Δ::hphNT1</i> ; [pBEVY-U-HA-hNAA30]; [pBEVY-L-hNAA35]      | 231, 342 | Fig. 2         | This study |
| 771   | Arl3-GFP, 35Δ38Δ, pBEVY-L          | BY4741; <i>ARL3::GFP-HIS3MX6</i> ; <i>naa35Δ::kanMX4</i> ; <i>naa38Δ::hphNT1</i> ; [pBEVY-L]; clone 2                                                 | 224      | Fig. 2B        | This study |
| 859   | Arl3-GFP, 35Δ, h35 (n.t.)          | BY4741; <i>ARL3::GFP-HIS3MX6</i> ; <i>naa35Δ::kanMX4</i> ; [pBEVY-L-hNAA35]; clone 2                                                                  | 342      | Fig. 2B        | This study |

| yTA # | Short name                          | Genotype                                                                                                                                                                    | pTA #    | Use           | Source     |
|-------|-------------------------------------|-----------------------------------------------------------------------------------------------------------------------------------------------------------------------------|----------|---------------|------------|
| 861   | Arl3-GFP, 35Δ38Δ, h35 (n.t.)        | BY4741; <i>ARL3::GFP-HIS3MX6</i> , <i>naa35Δ::kanMX4</i> ; <i>naa38Δ::hphNT1</i> ; [ <i>pBEVY-L-hNAA35</i> ]; clone 2                                                       | 342      | Fig. 2B       | This study |
| 863   | Arl3-GFP, NatCΔ, h30, h35 (n.t.)    | BY4741; <i>ARL3::GFP-HIS3MX6</i> ; <i>naa30Δ::kanMX4</i> ; <i>naa35Δ::natNT2</i> ; <i>naa38Δ::hphNT1</i> ; [ <i>pBEVY-U-HA-hNAA30</i> ]; [ <i>pBEVY-L-hNAA35</i> ]; clone 2 | 231, 342 | Fig. 2B       | This study |
| 855   | Arl3-GFP, Sec7-mRFP                 | BY4741; <i>ARL3::GFP-HIS3MX6</i> ; [ <i>316-Sec7-mRFP</i> ]                                                                                                                 | 321      | Fig. 3A       | This study |
| 830   | Arl3-GFP, mCherry-Sed5              | BY4741; <i>ARL3::GFP-HIS3MX6</i> ; [ <i>p415Met25-mCherry-Sed5</i> ]                                                                                                        | 340      | Fig. 3B       | This study |
| 832   | Arl3-GFP, 30Δ, h30, mCherry-Sed5    | BY4741; <i>ARL3::GFP-HIS3MX6</i> ; <i>naa30Δ::kanMX4</i> ; [ <i>pBEVY-U-HA-hNAA30</i> ]; [ <i>p415Met25-mCherry-Sed5</i> ]                                                  | 231, 340 | Fig. 3B       | This study |
| 371   | Arl3-GFP, pBEVY-U                   | BY4741; <i>ARL3::GFP-HIS3MX6</i> ; [ <i>pBEVY-U</i> ]                                                                                                                       | 53       | Fig. 4        | This study |
| 373   | Arl3-GFP, 30Δ, pBEVY-U              | BY4741; <i>ARL3::GFP-HIS3MX6</i> ; <i>naa30Δ::kanMX4</i> ; [ <i>pBEVY-U</i> ]                                                                                               | 53       | Fig. 4        | This study |
| 377   | Arl3-GFP, 30Δ, h50                  | BY4741; <i>ARL3::GFP-HIS3MX6</i> ; <i>naa30Δ::kanMX4</i> ; [ <i>pBEVY-U-hNA50</i> ]                                                                                         | 285      | Fig. 4A,B,D   | This study |
| 379   | Arl3-GFP, 30Δ, h60                  | BY4741; <i>ARL3::GFP-HIS3MX6</i> ; <i>naa30Δ::kanMX4</i> ; [ <i>pBEVY-U-hNAA60</i> ]                                                                                        | 286      | Fig. 4A,B,D   | This study |
| 954   | Arl3-GFP, 30Δ, h60 <sub>1-184</sub> | BY4741; <i>ARL3::GFP-HIS3MX6</i> ; <i>naa30Δ::kanMX4</i> ; [ <i>pBEVY-U-hNAA60<sub>1-184</sub></i> ]                                                                        | 378      | Fig. 4C,D, SG | This study |
| 509   | Arl3-GFP, 35Δ, pBEVY-U              | BY4741; <i>ARL3::GFP-HIS3MX6</i> ; <i>naa35Δ::kanMX4</i> ; [ <i>pBEVY-U</i> ]                                                                                               | 53       | Fig. 4C,D     | This study |
| 532   | Arl3-GFP, 35Δ, h60                  | BY4741; <i>ARL3::GFP-HIS3MX6</i> ; <i>naa35Δ::kanMX4</i> ; [ <i>pBEVY-U-hNAA60</i> ]                                                                                        | 286      | Fig. 4C,D     | This study |
| 1010  | Arl3-GFP, pBEVY-U, mCherry-Sed5     | BY4741; [ <i>pBEVY-U</i> ]; [ <i>p415Met25-mCherry-Sed5</i> ]                                                                                                               | 53, 340  | Fig. 5A       | This study |
| 1012  | Arl3-GFP, 30Δ, mCherry-Sed5         | BY4741; <i>ARL3::GFP-HIS3MX6</i> ; <i>naa30Δ::kanMX4</i> ; [ <i>pBEVY-U</i> ]; [ <i>p415Met25-mCherry-Sed5</i> ]                                                            | 53, 340  | Fig. 5A       | This study |

| yTA # | Short name                                         | Genotype                                                                                                                                | pTA #    | Use     | Source     |
|-------|----------------------------------------------------|-----------------------------------------------------------------------------------------------------------------------------------------|----------|---------|------------|
| 834   | Arl3-GFP, 30Δ, h60, mCherry-Sed5                   | BY4741; <i>ARL3::GFP-HIS3MX6</i> ; <i>naa30Δ::kanMX4</i> ; [ <i>pBEVY-U-hNAA60</i> ]; [ <i>p415Met25-mCherry-Sed5</i> ]                 | 286, 340 | Fig. 5A | This study |
| 1014  | Arl3-GFP, 30Δ, h60 <sub>1-184</sub> , mCherry-Sed5 | BY4741; <i>ARL3::GFP-HIS3MX6</i> ; <i>naa30Δ::kanMX4</i> ; [ <i>pBEVY-U-hNAA60<sub>1-184</sub></i> ]; [ <i>p415Met25-mCherry-Sed5</i> ] | 340, 378 | Fig. 5A | This study |
| 1001  | h60-EGFP                                           | BY4741; [ <i>pBEVY-U-hNAA60-EGFP</i> ]                                                                                                  | 452      | Fig. 5B | This study |
| 1006  | h60 <sub>1-182</sub> -EGFP                         | BY4742; [ <i>pBEVY-U-hNAA60<sub>1-182</sub>-EGFP</i> ]                                                                                  | 453      | Fig. 5B | This study |
| 639   | Arl3-GFP, pBEVY-L                                  | BY4741; <i>ARL3::GFP-HIS3MX6</i> ; [ <i>pBEVY-L</i> ]                                                                                   | 224      | SG      | This study |
| 683   | Arl3-GFP, 30Δ35Δ                                   | BY4741; <i>ARL3::GFP-HIS3MX6</i> ; <i>naa30Δ::kanMX4</i> ; <i>naa35Δ::natNT2</i>                                                        |          | SG      | This study |
| 767   | Arl3-GFP, 35Δ38Δ                                   | BY4741; <i>ARL3::GFP-HIS3MX6</i> ; <i>naa35Δ::kanMX4</i> ; <i>naa38Δ::hphNT1</i>                                                        |          | SG      | This study |
| 748   | Arl3-GFP, NatCΔ                                    | BY4741; <i>ARL3::GFP-HIS3MX6</i> ; <i>naa30Δ::kanMX4</i> ; <i>naa35Δ::natNT2</i> ; <i>naa38Δ::hphNT1</i>                                |          | SG      | This study |
| 686   | Arl3-GFP, 30Δ35Δ, pBEVY-U                          | BY4741; <i>ARL3::GFP-HIS3MX6</i> ; <i>naa30Δ::kanMX4</i> ; <i>naa35Δ::natNT2</i> ; [ <i>pBEVY-U</i> ]                                   | 53       | SG      | This study |
| 688   | Arl3-GFP, 30Δ35Δ, h30                              | BY4741; <i>ARL3::GFP-HIS3MX6</i> ; <i>naa30Δ::kanMX4</i> ; <i>naa35Δ::natNT2</i> ; [ <i>pBEVY-U-HA-hNAA30</i> ]                         | 231      | SG      | This study |

Abbreviations: 30/35/38 Δ; *naa30/35/38 Δ*; h30/35/50/60; hNaa30/35/50/60; n.t., not tagged; p, plasmid; SG, strain generation; yTA#, internal yeast strain number; pTA#, internal plasmid number; TA, Thomas Arnesen lab; yTA, internal yeast strain number.

**Table S2. The plasmids of this study.**

| <b>pTA #</b> | <b>Name</b>                                 | <b>Source</b>      |
|--------------|---------------------------------------------|--------------------|
| 53           | pBEVY-U                                     | <sup>2</sup>       |
| 75           | pCDNA3.1- <i>hNAA60-V5-His</i>              | <sup>3</sup>       |
| 185          | pCMV6-AC- <i>NAA35-GFP</i>                  | OriGene            |
| 224          | pBEVY-L                                     | <sup>2</sup>       |
| 226          | pBEVY-L- <i>hNAA35-FLAG</i>                 | This study         |
| 229          | pFA6a- <i>natNT2</i>                        | EUROSCARF          |
| 231          | pBEVY-U- <i>HA-hNAA30</i>                   | This study         |
| 250          | pFA6a- <i>hphNT1</i>                        | EUROSCARF          |
| 285          | pBEVY-U- <i>hNAA50</i>                      | <sup>4</sup>       |
| 286          | pBEVY-U- <i>hNAA60</i>                      | <sup>3</sup>       |
| 378          | pBEVY-U- <i>hNAA60<sub>1-184</sub></i>      | This study         |
| 321          | 316- <i>Sec7-mRFP</i>                       | RIKEN BRC DNA BANK |
| 340          | p415Met25- <i>mCherry-Sed5</i>              | <sup>5</sup>       |
| 342          | pBEVY-L- <i>hNAA35</i>                      | This study         |
| 407          | <i>phNAA60-EGFP-N1</i>                      | This study         |
| 439          | <i>phNAA60<sub>1-182</sub>-EGFP-N1</i>      | This study         |
| 452          | pBEVY-U- <i>hNAA60-EGFP</i>                 | This study         |
| 453          | pBEVY-U- <i>hNAA60<sub>1-182</sub>-EGFP</i> | This study         |

Abbreviations: pTA#, internal plasmid number; TA, Thomas Arnesen lab

**Table S3. Primers used for amplification of yeast and human genes.**

| oyTA # | Sequence (5' to 3')                                                                                          | Use                                                                        | Source     |
|--------|--------------------------------------------------------------------------------------------------------------|----------------------------------------------------------------------------|------------|
| 49     | CATGAAGAACAAAGTTTCAC                                                                                         | Amplify <i>kanMX4</i> with <i>yNAA30</i> flanks from genomic DNA of yTA44  | 1          |
| 50     | CCTCTTTTCTCTACTGCC                                                                                           |                                                                            |            |
| 211    | CTGTGCTAGTGTAGAGCAACTTTGATAATAGCTGGT<br>ACGTTTCCGAGAATGGAAGTAGACAGTATATTAGGC<br>GGATCCCCGGGTTAATTAA          | Amplify <i>natNT2</i> with <i>yNAA35</i> flanks from pTA229                | This study |
| 212    | CCTTTATAATAATTAATAGCGGGTATATAATGCTAA<br>ATATATTTTGTACAGTTAGGGTAAATCCAGATTATT<br>TATAGCGGGAATTCGAGCTCGATTACAA |                                                                            |            |
| 148    | CTCCCACTTTAAAGTAAATCCGGAGATTCCC                                                                              | Amplify <i>natNT2</i> with <i>yNAA35</i> flanks from genomic DNA of yTA683 | This study |
| 149    | GGGGGAACGCACTGCATTTTACC                                                                                      |                                                                            |            |
| 244    | GGGTGAAGATAGTCTTCAACAACTTAGTAAGGGGC<br>ACCAAAGCGTCATGCGTACGCTGCAGGTCGAC                                      | Amplify <i>hphNT1</i> with <i>yNAA38</i> flanks from pTA250                | This study |
| 245    | GCCAAGCAATTGTTACTATGGAACTATTAGAACCAT<br>ATGCGCTAATCGATGAATTCGAGCTCG                                          |                                                                            |            |
| 51     | CTACCAAGAAACCGGGTAGC                                                                                         | PCR screen for <i>naa30Δ</i>                                               | 1          |
| 52     | GAAACTTGCTTTATTATCTCTC                                                                                       |                                                                            |            |
| 146    | CGTAGCTTCCCAACTTCACCAG                                                                                       | PCR screen for <i>naa35Δ</i>                                               | This study |
| 147    | CGAACTGTAACCTCAAAGAAGCCTTGAAATTTACC                                                                          |                                                                            |            |
| 9      | CTCGGAAGTGCATGAGTTCTGAC                                                                                      | PCR screen for <i>naa38Δ</i>                                               | This study |
| 11     | G TTCAGTCCAGTTCATATTCG                                                                                       |                                                                            |            |
| oTA #  | Sequence (5' to 3')                                                                                          | Use                                                                        | Source     |
| 99     | CATTCTAGACTCGAGACCATGGTTATGAAAGCTTCTG                                                                        | Amplify <i>hNAA35-FLAG</i> from pTA185                                     | This study |
| 98     | CATCTGCAGTCACTTGTATCGTCGTCCTTGTAATCA<br>ACAAGTTTCACAACAGG                                                    |                                                                            |            |
| 420    | GTCGTCCTTGTAATCTCAAACAAGTTTCACAAC                                                                            | Mutagenesis of pTA226, generating pTA342                                   | This study |
| 490    | CCTATGTCCTCTACATCAACGGCGGCTGACCTCCCTG<br>GACGATTTTGG                                                         | Mutagenesis of pTA286, generating pTA378                                   | This study |
| 17     | GCGGGCTAGCATGACAGAGGTGGTGCCATCC                                                                              | Amplify <i>hNAA60<sub>1-182</sub></i> from pTA75                           | This study |
| 463    | GGTACCGGGTTGATGTAGAGGACATAGG                                                                                 |                                                                            |            |
| 18     | GCGGGGTACCCCATGGTCCGGCTGTACTCG                                                                               | Amplify <i>hNAA60</i> from                                                 | This study |

|     |                                  |                                                                                           |            |
|-----|----------------------------------|-------------------------------------------------------------------------------------------|------------|
|     |                                  | pTA75 (together with oTA17)                                                               |            |
| 528 | GATCATTCTAGAGAGAATGACAGAGGTGGTGC | Amplify <i>hNAA60-EGFP</i> from pTA407 and <i>hNAA60<sub>1-182</sub>-EGFP</i> from pTA439 | This study |
| 529 | GATCATGTCGACTTACTTGTACAGCTCGTCC  |                                                                                           |            |

Abbreviations: oTA, internal oligo number; oyTA, internal yeast oligo number; pTA#, internal plasmid number; TA, Thomas Arnesen lab



## References Supplementary Tables

- 1 Aksnes, H., Osberg, C. & Arnesen, T. N-terminal acetylation by NatC is not a general determinant for substrate subcellular localization in *Saccharomyces cerevisiae*. *PLoS One* **8**, e61012,(2013).
- 2 Miller, C. A., Martinat, M. A. & Hyman, L. E. Assessment of aryl hydrocarbon receptor complex interactions using pBEVY plasmids: expression vectors with bi-directional promoters for use in *Saccharomyces cerevisiae*. *Nucleic Acids Research* **26**, 3577-3583,(1998).
- 3 Van Damme, P. *et al.* NatF contributes to an evolutionary shift in protein N-terminal acetylation and is important for normal chromosome segregation. *PLoS Genet* **7**, e1002169,(2011).
- 4 Van Damme, P., Hole, K., Gevaert, K. & Arnesen, T. N-terminal acetylome analysis reveals the specificity of Naa50 (Nat5) and suggests a kinetic competition between N-terminal acetyltransferases and methionine aminopeptidases. *Proteomics* **15**, 2436-2446,(2015).
- 5 Powis, K. *et al.* Get3 is a holdase chaperone and moves to deposition sites for aggregated proteins when membrane targeting is blocked. *Journal of Cell Science* **126**, 473-483,(2013).
